# Supplementary material for: Early coagulation tests predict risk stratification and prognosis of COVID-19
Source: publisher site journal article supplement (doi:10.18632/aging.103581), 2020-08-29
Supplement: Supplementary file [file aging-v12i16-103581-supplementary-material-SD1.pdf]

**SUPPLEMENTARY FIGURES**

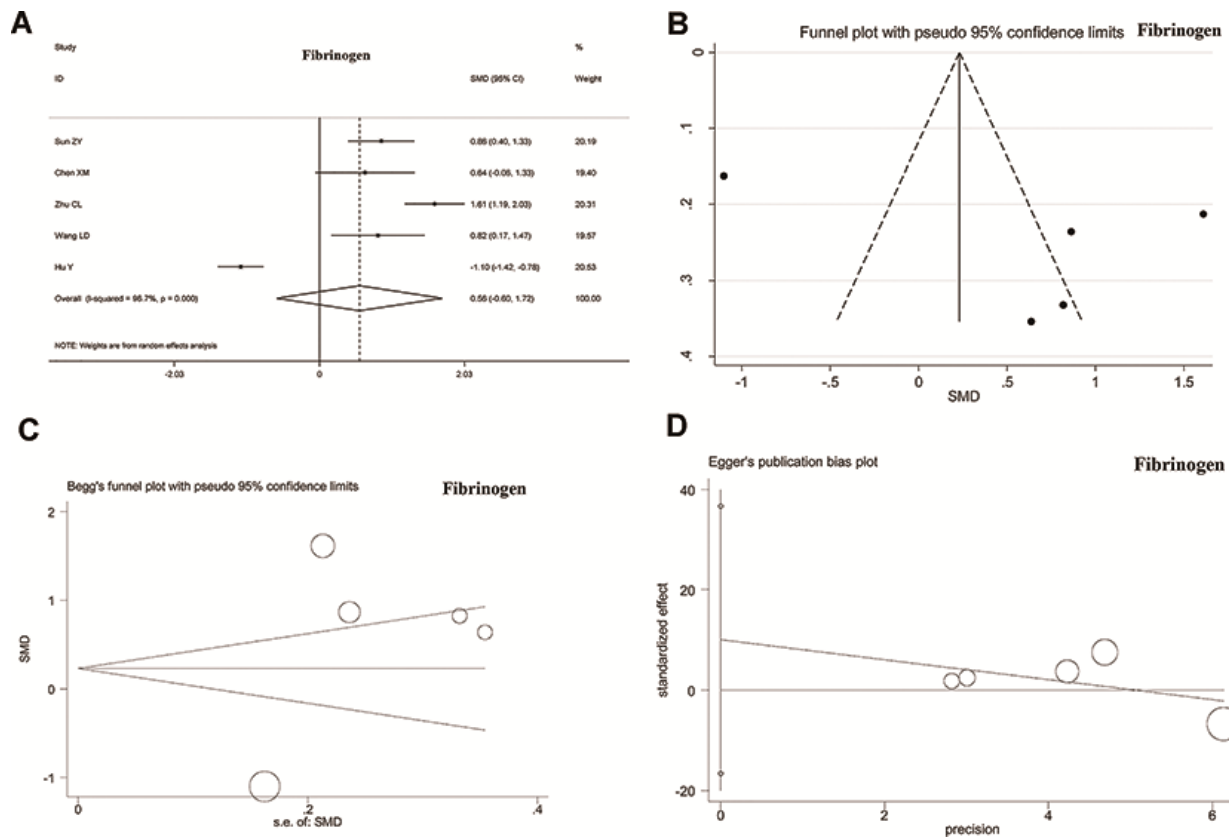

**Supplementary Figure 1. Forest plots and publication bias of fibrinogen.** Forest plots of pooled standard mean difference and 95% CIs assessing the severity status of COVID-19 patients by fibrinogen. The sizes of the blocks or diamonds represent the weights, and the lengths of the straight lines represent the widths of the 95% CI (A) Funnel plot (B) Egger's test (C) and Begg's (D) test assessing the publication bias of fibrinogen.

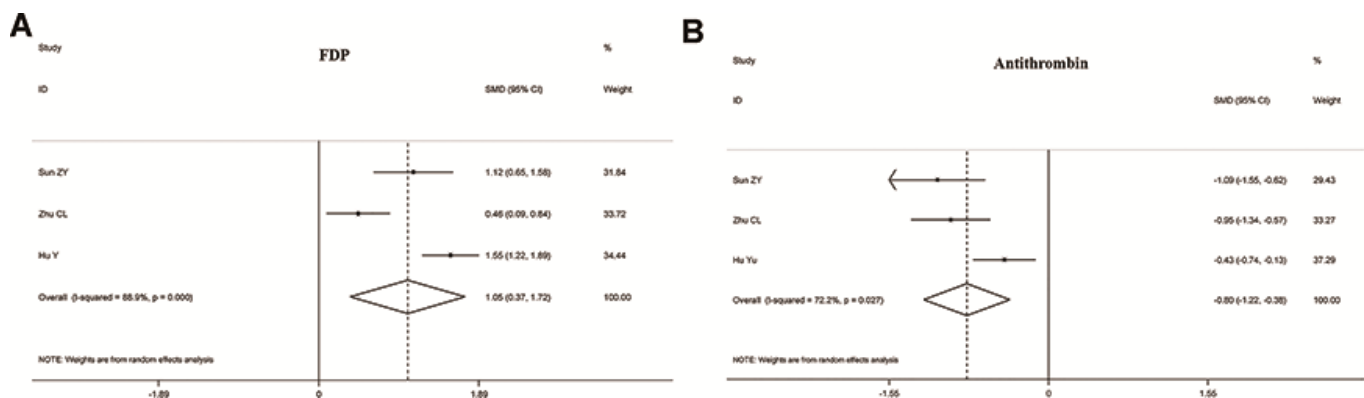

**Supplementary Figure 2. Forest plots of pooled standard mean difference and 95% CIs assessing the severity status of COVID-19 patients by fibrin/fibrinogen degradation products (FDP) (A) and antithrombin (B).** The sizes of the blocks or diamonds represent the weights, and the lengths of the straight lines represent the widths of the 95% CIs.

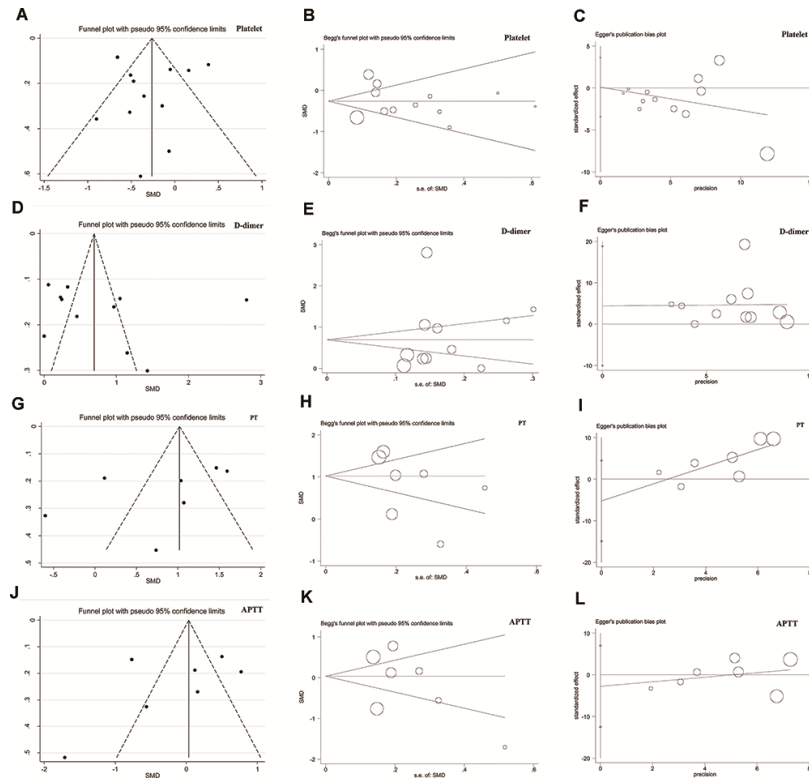

**Supplementary Figure 3.** Funnel plot, Egger's test and Begg's test assessing the publication bias of platelet (A–C) D-dimer (D–F) prothrombin time (PT) (G–I) and activated partial thromboplastin time (APTT) (J–L) associated with the severity status, respectively.

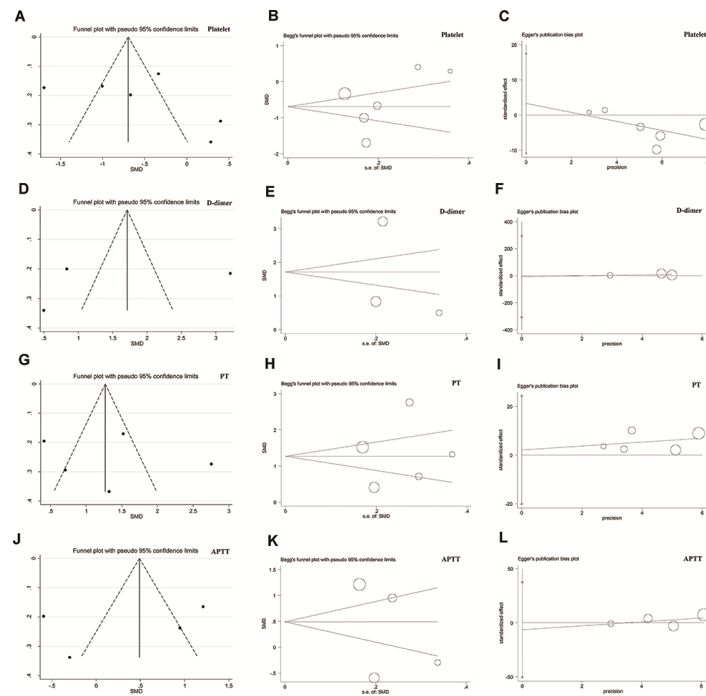

**Supplementary Figure 4.** Funnel plot, Egger's test and Begg's test assessing the publication bias of platelet (A–C) D-dimer (D–F) prothrombin time (PT) (G–I) and activated partial thromboplastin time (APTT) (J–L) associated with the composite endpoint, respectively.

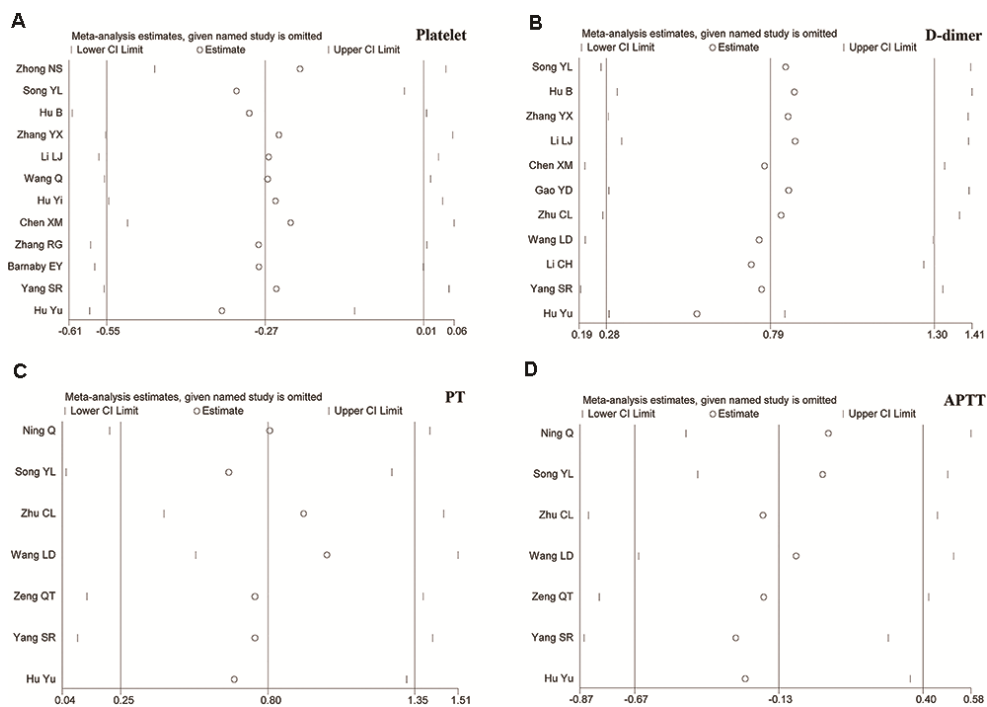

**Supplementary Figure 5.** Sensitivity analysis of studies involving platelet (A) D-dimer (B) prothrombin time (PT) (C) and activated partial thromboplastin time (APTT) (D) associated with the severity status. None of the articles removed would have a significant effect on the results.

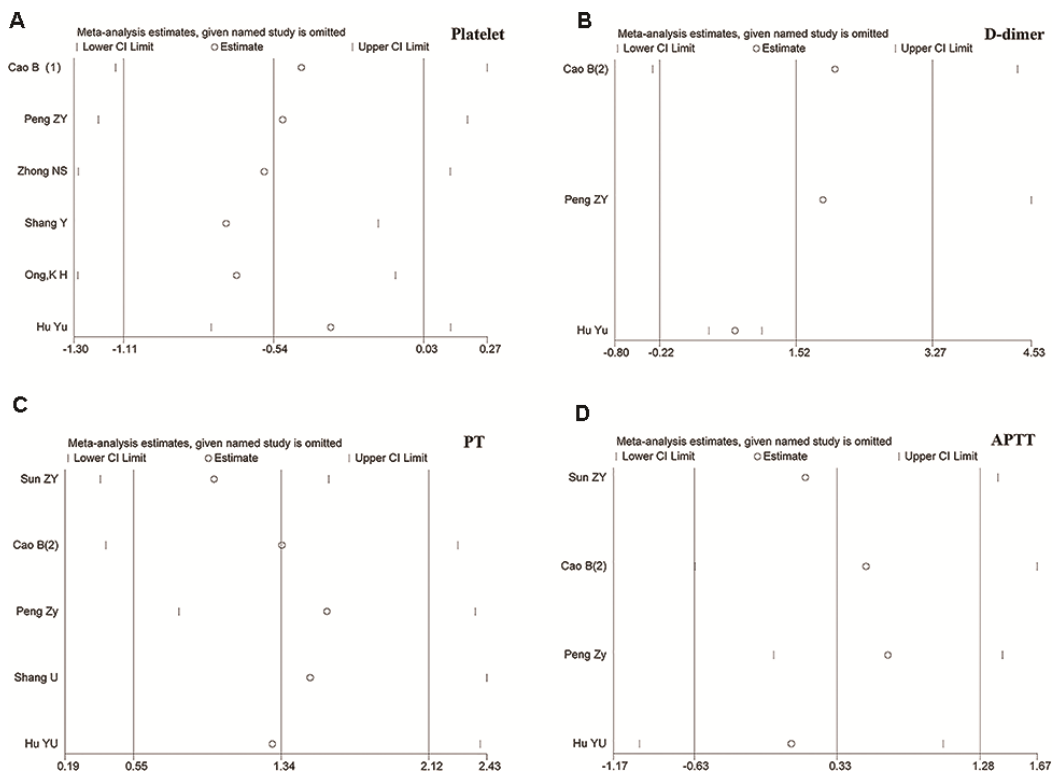

**Supplementary Figure 6.** Sensitivity analysis of studies involving platelet (A) D-dimer (B) prothrombin time (PT) (C) and activated partial thromboplastin time (APTT) (D) associated with the composite endpoint. None of the articles removed would have a significant effect on the results.
